# Supplementary material
Source: PubMed Central journal article supplement (PMC3288892)

**Supplementary Figure**

**Figure S1. Treatment of NZB/W mice with peptides does not affect T<sub>Eff</sub> proliferation.** *In vitro* proliferation assay on sorted T<sub>Eff</sub> from mice tolerized with pCons or control pNeg after stimulated for 3 days with CD3/CD28 Ab. P ns.

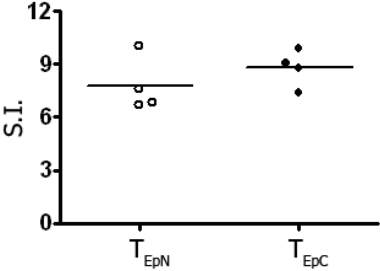

Supplement: NIHMS338848-supplement-01.pdf [file NIHMS338848-supplement-01.pdf]
